# Supplementary material for: Research on wearable technologies for learning: a systematic review
Source: Frontiers journal article supplement (doi:10.3389/feduc.2023.1270389), 2023-11-09
Supplement: Data_Sheet_1.PDF [file Data_Sheet_1.PDF]

## APPENDIX

*Table A. Papers on Wearables for Learning Classified by Manner of Use*

| Manner of Wearable Use: Capture data to inform learning |                     |                                                                                                                                         |      |            |                 |                                                 |                     |                         |
|---------------------------------------------------------|---------------------|-----------------------------------------------------------------------------------------------------------------------------------------|------|------------|-----------------|-------------------------------------------------|---------------------|-------------------------|
| #                                                       | Authors             | Paper Title                                                                                                                             | Year | Paper Type | Wearable Types  | Subject Areas                                   | Population Type     | Settings                |
| 1                                                       | Buchem et al.       | Designing for User Engagement in Wearable-technology Enhanced Learning for Healthy Ageing                                               | 2015 | Design     | Smart wristband | Health                                          | Students            | None                    |
| 2                                                       | Buchem et al.       | Gamification Designs in Wearable Enhanced Learning for Healthy Ageing                                                                   | 2015 | Design     | Smart wristband | Health                                          | Students            | Anywhere                |
| 3                                                       | Chu et al.          | Toward Wearable App Design for Children's In-the-World Science Inquiry                                                                  | 2017 | Study      | Smartwatch      | Science                                         | Students            | Lab, Anywhere           |
| 4                                                       | Ciolacu et al.      | Education 4.0 - Jump to Innovation with IoT in Higher Education                                                                         | 2019 | Study      | Smartwatch      | Health                                          | Students            | Anywhere                |
| 5                                                       | Ciolacu et al.      | Enabling IoT in Education 4.0 with BioSensors from Wearables and Artificial Intelligence                                                | 2019 | Study      | Smartwatch      | Math, General                                   | Students            | School                  |
| 6                                                       | Coffman and Klinger | Google Glass: Using Wearable Technologies to Enhance Teaching and Learning                                                              | 2015 | Study      | Smart glasses   | Educational psychology, Organizational behavior | Students + teachers | School                  |
| 7                                                       | Ezenwoke et al.     | Wearable Technology: Opportunities and Challenges for Teaching and Learning in Higher Education in Developing Countries                 | 2016 | Study      | Smart glasses   | Accounting                                      | Teachers            | School                  |
| 8                                                       | Garcia et al.       | Wearables for Learning: Examining the Smartwatch as a Tool for Situated Science Reflection                                              | 2018 | Study      | Smartwatch      | Science                                         | Students            | Anywhere, School        |
| 9                                                       | Giannakos et al.    | Monitoring Children's Learning Through Wearable Eye-Tracking: The Case of a Making- Based Coding Activity                               | 2019 | Study      | Smart glasses   | Programming; Electronics                        | Students            | Workshop                |
| 10                                                      | Giannakos et al.    | Fitbit for learning: Towards capturing the learning experience using wearable sensing                                                   | 2020 | Study      | Smart wristband | Software engineering                            | Students            | School                  |
| 11                                                      | Grunerbl et al.     | Monitoring and enhancing nurse emergency training with wearable devices                                                                 | 2015 | Design     | Smartwatch      | Health                                          | Students            | None                    |
| 12                                                      | Ishimaru et al.     | Towards an intelligent textbook: eye gaze-based attention extraction on materials for learning and instruction in physics               | 2016 | Study      | Smart glasses   | Physics                                         | Students            | School                  |
| 13                                                      | Lu et al.           | Harnessing Commodity Wearable Devices to Capture Learner Engagement                                                                     | 2019 | System     | Smart wristband | General                                         | Students + teachers | School                  |
| 14                                                      | Di Mitri et al.     | Learning Pulse: Using Wearable Biosensors and Learning Analytics to Investigate and Predict Learning Success in Self-regulated Learning | 2016 | Study      | Sensors         | Learning                                        | Students            | None                    |
| 15                                                      | Park et al.         | Design of a wearable sensor badge for smart kindergarten                                                                                | 2002 | System     | Badge           | General                                         | Students            | None                    |
| 16                                                      | Pijeira-Diaz et al. | Investigating collaborative learning success with physiological coupling indices based on electrodermal activity                        | 2016 | Study      | Smart wristband | Science                                         | Students            | Lab set up as classroom |

|    |                     |                                                                                                                                 |      |        |                        |                                         |                     |                 |
|----|---------------------|---------------------------------------------------------------------------------------------------------------------------------|------|--------|------------------------|-----------------------------------------|---------------------|-----------------|
| 17 | Pijera-Diaz et al.  | Sympathetic arousal commonalities and arousal contagion during collaborative learning: How attuned are triad members?           | 2019 | Study  | Smart wristband        | Physics                                 | Students            | School          |
| 18 | Prieto et al.       | Teaching Analytics: Towards Automatic Extraction of Orchestration Graphs Using Wearable Sensors                                 | 2016 | Study  | Sensors, Smart glasses | Math                                    | Teachers            | Lab             |
| 19 | Russell et al.      | First “Glass” Education: Telementored Cardiac Ultrasonography Using Google Glass- A Pilot Study                                 | 2014 | Study  | Smart glasses          | Medicine                                | Students            | Lab             |
| 20 | Scholl et al.       | Wearable digitization of life science experiments                                                                               | 2014 | Design | Smart glasses          | Science                                 | Students            | None            |
| 21 | Spann and Schaeffer | Expanding the scope of learning analytics data: preliminary findings on attention and self-regulation using wearable technology | 2017 | Study  | Smart wristband        | Cybersecurity                           | Students            | Learning center |
| 22 | Steele and Steele   | Applying affective computing techniques to the field of special education                                                       | 2014 | Theory | General                | Writing                                 | Students            | None            |
| 23 | Sung et al.         | MIT.EDU: M-learning Applications for Classroom Settings                                                                         | 2004 | System | Custom device          | Finance, Business, Digital Anthropology | Students + teachers | School          |
| 24 | Sung et al.         | Mobile-IT Education (MIT.EDU):m-learning applications for classroom settings                                                    | 2005 | System | Custom device          | Finance, Business, Digital Anthropology | Students + teachers | School          |
| 25 | Teeters             | Use of a Wearable Camera System in Conversation: Toward a Companion Tool for SocialEmotional Learning in Autism                 | 2007 | Thesis | Custom device          | N/A                                     | Students            | N/A             |

### **Manner of Wearable Use: *Guide embodied behaviors***

|    | <b>Authors</b>       | <b>Paper Title</b>                                                                          | <b>Year</b> | <b>Paper Type</b> | <b>Wearable Types</b>   | <b>Subject Areas</b>     | <b>Population Type</b> | <b>Settings</b> |
|----|----------------------|---------------------------------------------------------------------------------------------|-------------|-------------------|-------------------------|--------------------------|------------------------|-----------------|
| 26 | Hallam et al.        | Ballet hero: building a garment for memetic embodiment in dance learning                    | 2014        | Design            | Clothing                | Dancing                  | Students + teachers    | Dance hall      |
| 27 | Huang et al.         | PianoTouch: A Wearable Haptic Piano Instruction System for Passive Learning of Piano Skills | 2008        | Study             | Gloves                  | Music                    | Students               | None            |
| 28 | Johnson et al.       | MusicJacket: the efficacy of realtime vibrotactile feedback for learning to play the violin | 2010        | Study             | Smart wristband         | Music                    | Students               | Lab             |
| 29 | Kutafina et al.      | Wearable sensors in medical education: supporting hand hygiene training with a forearm EMG  | 2015        | System            | Clothing                | Medicine                 | Students               | None            |
| 30 | Luzhnica et al.      | Passive haptic learning for vibrotactile skin reading                                       | 2018        | Study             | Gloves                  | Skin reading             | Students               | Lab             |
| 31 | Matsushita and Iwase | Detecting strumming action while playing guitar                                             | 2013        | System            | Custom device; Clothing | Music                    | Students               | Lab             |
| 32 | Myllykoski et al.    | Prototyping hand-based wearable music education technology                                  | 2015        | System            | Gloves                  | Music                    | Students + teachers    | None            |
| 33 | Pescara et al.       | Reevaluating passive haptic learning of morse code                                          | 2019        | Study             | Custom device; Clothing | Morse code; Skin reading | Students               | Lab             |
| 34 | Ponce et al.         | Emerging technology in surgical education: combining real-time                              | 2014        | Theory            | Smart glasses           | Medicine                 | Students               | Surgical room   |

|                                                                       |                     |                                                                                                                                                   |             |                   |                         |                                          |                        |                             |
|-----------------------------------------------------------------------|---------------------|---------------------------------------------------------------------------------------------------------------------------------------------------|-------------|-------------------|-------------------------|------------------------------------------|------------------------|-----------------------------|
|                                                                       |                     | augmented reality and wearable computing devices                                                                                                  |             |                   |                         |                                          |                        |                             |
| 35                                                                    | Seim et al.         | Passive haptic learning of Braille typing                                                                                                         | 2014        | Study             | Gloves                  | Typing                                   | Students               | Lab                         |
| 36                                                                    | Seim et al.         | Towards haptic learning on a smartwatch                                                                                                           | 2018        | Study             | Smartwatch              | Morse code                               | Students               | Lab                         |
| 37                                                                    | Spelmezan           | An investigation into the use of tactile instructions in snowboarding                                                                             | 2012        | Study             | Custom device; Clothing | Snowboarding                             | Students               | Indoor ski resort           |
| <b>Manner of Wearable Use: <i>Guide the structure of learning</i></b> |                     |                                                                                                                                                   |             |                   |                         |                                          |                        |                             |
|                                                                       | <b>Authors</b>      | <b>Paper Title</b>                                                                                                                                | <b>Year</b> | <b>Paper Type</b> | <b>Wearable Types</b>   | <b>Subject Areas</b>                     | <b>Population Type</b> | <b>Settings</b>             |
| 38                                                                    | Arroyo et al.       | Wearable learning: Multiplayer embodied games for math                                                                                            | 2017        | Study             | Smartwatch              | Math                                     | Students               | School                      |
| 39                                                                    | Bower and Sturman   | What are the educational affordances of wearable technologies?                                                                                    | 2015        | Study             | Smart glasses           | General                                  | Teachers               | None                        |
| 40                                                                    | Cheng and Tsai      | A case study of immersive virtual field trips in an elementary classroom: Students' learning experience and teacher-student interaction behaviors | 2019        | Study             | Smart glasses           | Social studies                           | Students               | School                      |
| 41                                                                    | Dieck et al.        | Enhancing art gallery visitors' learning experience using wearable augmented reality: generic learning outcomes perspective                       | 2018        | Study             | Smart glasses           | Art                                      | Students               | Art gallery                 |
| 42                                                                    | Engen et al.        | Wearable Technologies in the K-12 Classroom- Cross-disciplinary Possibilities and Privacy Pitfalls                                                | 2018        | Study             | Smart wristband         | Physical education; Social studies; Math | Students               | School                      |
| 43                                                                    | Hatami              | A study on students' attitude toward employing smart glasses as a medium for e-learning                                                           | 2016        | Thesis            | Smart glasses           | Language                                 | Students               | Campus; Home; Library       |
| 44                                                                    | Kawai et al.        | Tsunami Evacuation Drill System Using Smart Glasses                                                                                               | 2015        | Design            | Smart glasses           | Disaster education                       | Students               | School                      |
| 45                                                                    | Kazemitabaar et al. | MakerWear: A Tangible Approach to Interactive Wearable Creation for Children                                                                      | 2017        | Study             | Clothing                | STEM                                     | Students               | Museum; Afterschool program |
| 46                                                                    | Kommerer et al.     | Smart Augmented Reality Glasses in Cybersecurity and Forensic Education                                                                           | 2016        | Theory            | Smart glasses           | Cybersecurity ; Forensics                | Students               | None                        |
| 47                                                                    | Leue et al. [46]    | Google Glass Augmented Reality: Generic Learning Outcomes for Art Galleries                                                                       | 2015        | Study             | Smart glasses           | Art                                      | Students               | Art gallery                 |
| 48                                                                    | Lindberg et al.     | Enhancing Physical Education with Exergames and Wearable Technology                                                                               | 2016        | Study             | Smart wristband         | Physical education                       | Students               | School                      |
| 49                                                                    | Liu                 | Tangram Race Mathematical Game: Combining Wearable Technology and Traditional Games for Enhancing Mathematics Learning                            | 2014        | Thesis            | Custom device           | Math                                     | Students               | School                      |
| 50                                                                    | Liu and Chiang      | Smart glasses based intelligent trainer for factory new recruits                                                                                  | 2018        | System            | Smart glasses           | Industrial tasks                         | Students               | Lab set up as factory       |
| 51                                                                    | Lukowicz et al.     | Glass-physics: using google glass to support high school physics experiments                                                                      | 2015        | Study             | Smart glasses           | Physics                                  | Students               | Lab                         |
| 52                                                                    | Moshtaghi et al.    | Using Google Glass to Solve Communication and Surgical Education Challenges in the Operating Room                                                 | 2015        | Study             | Smart glasses           | Medicine; Surgery                        | Students + teachers    | Surgical room               |

|                                                                                       |                           |                                                                                                                             |             |                   |                           |                             |                        |                         |
|---------------------------------------------------------------------------------------|---------------------------|-----------------------------------------------------------------------------------------------------------------------------|-------------|-------------------|---------------------------|-----------------------------|------------------------|-------------------------|
| 53                                                                                    | Scholl et al.             | Wearables in the wet lab: a laboratory system for capturing and guiding experiments                                         | 2015        | System            | Smart glasses; Smartwatch | Science                     | Students               | School                  |
| 54                                                                                    | Shadiev et al.            | Study of the use of wearable devices for healthy and enjoyable English as a foreign language learning in authentic contexts | 2018        | Study             | Smartwatch                | Language                    | Students               | School                  |
| 55                                                                                    | Spitzer et al.            | Distance Learning and Assistance Using Smart Glasses                                                                        | 2018        | Study             | Smart glasses             | Industrial tasks            | Teachers               | Lab                     |
| 56                                                                                    | Spitzer et al.            | Project Based Learning: from the Idea to a Finished LEGO Technic Artifact, Assembled by Using Smart Glasses                 | 2017        | Study             | Smart glasses             | Industrial tasks            | Students               | Lab                     |
| 57                                                                                    | Spitzer et al.            | Use cases and architecture of an information system to integrate smart glasses in educational environments                  | 2016        | Theory            | Smart glasses             | Knitting                    | Students + teachers    | Lab                     |
| 58                                                                                    | Vallurupalli et al.       | Wearable technology to improve education and patient outcomes in a cardiology fellowship program- a feasibility study       | 2013        | Study             | Smart glasses             | Medicine                    | Students               | None                    |
| 59                                                                                    | Vishkaie                  | Can wearable technology improve children's creativity?                                                                      | 2018        | Study             | General                   | General                     | Students               | Lab                     |
| 60                                                                                    | Weppner et al.            | Physics Education with Google Glass gPhysics Experiment App                                                                 | 2014        | System            | Smart glasses             | Physics                     | Students               | None                    |
| <b>Manner of Wearable Use: Guide students' classroom behaviors</b>                    |                           |                                                                                                                             |             |                   |                           |                             |                        |                         |
|                                                                                       | <b>Authors</b>            | <b>Paper Title</b>                                                                                                          | <b>Year</b> | <b>Paper Type</b> | <b>Wearable Types</b>     | <b>Subject Areas</b>        | <b>Population Type</b> | <b>Settings</b>         |
| 61                                                                                    | Watanabe and Yano         | Using wearable sensor badges to improve scholastic performance                                                              | 2013        | Study             | Badge                     | General                     | Students + teachers    | School                  |
| 62                                                                                    | Zheng and Motti           | Assisting students with intellectual and developmental disabilities in inclusive education with smartwatches                | 2018        | Design            | Smartwatch                | General                     | Students               | School                  |
| 63                                                                                    | Zheng and Motti           | Wearable Life: A Wrist-Worn Application to Assist Students in Special Education                                             | 2017        | Design            | Smartwatch                | General                     | Students + teachers    | Learning center         |
| <b>Manner of Wearable Use: Help teachers to learn about the class or the students</b> |                           |                                                                                                                             |             |                   |                           |                             |                        |                         |
|                                                                                       | <b>Authors</b>            | <b>Paper Title</b>                                                                                                          | <b>Year</b> | <b>Paper Type</b> | <b>Wearable Types</b>     | <b>Subject Areas</b>        | <b>Population Type</b> | <b>Settings</b>         |
| 64                                                                                    | de la Guia et al.         | Introducing IoT and wearable technologies into task-based language learning for young children                              | 2016        | Study             | Smartwatch                | Language                    | Students               | Lab set up as classroom |
| 65                                                                                    | Holstein et al.           | The Classroom as a Dashboard: Co-designing Wearable Cognitive Augmentation for K-12 Teachers                                | 2018        | Study             | Smart glasses             | General                     | Teachers               | Lab                     |
| 66                                                                                    | Kumar et al.              | Use of smart glasses in education - a study                                                                                 | 2018        | Theory            | Smart glasses             | General                     | Teachers               | None                    |
| 67                                                                                    | Llorente and Morant       | Wearable Computers and Big Data: Interaction Paradigms for Knowledge Building in Higher Education                           | 2014        | Theory            | Smartwatch; Smart glasses | General                     | Teachers               | None                    |
| 68                                                                                    | Martinez-Maldonado et al. | Teacher Tracking with Integrity: What Indoor Positioning Can Reveal About Instructional Proxemics                           | 2020        | Study             | Badge; Custom device      | Design; Healthcare; Science | Teachers               | School                  |
| 69                                                                                    | Martinez-Maldonado et al. | Physical Learning Analytics: A Multimodal Perspective                                                                       | 2018        | Design            | Sensors                   | Dancing; Healthcare         | Teachers               | School                  |

|                                                                   |                       |                                                                                                                                   |             |                   |                             |                      |                        |                          |
|-------------------------------------------------------------------|-----------------------|-----------------------------------------------------------------------------------------------------------------------------------|-------------|-------------------|-----------------------------|----------------------|------------------------|--------------------------|
| 70                                                                | Pirkl et al.          | Any Problems? a wearable sensorbased platform for representational learning-analytics                                             | 2016        | Study             | Smartwatch                  | Physics              | Students               | Lab                      |
| 71                                                                | Quintana et al.       | Keeping Watch: Exploring Wearable Technology Designs for K-12 Teachers                                                            | 2016        | Study             | Smartwatch                  | Astronomy            | Teachers               | School                   |
| 72                                                                | Ueda and Ikeda        | Stimulation Methods for Students' Studies using Wearable Technology                                                               | 2016        | System            | Smartwatch; Smart wristband | General              | Students + teachers    | School                   |
| <b>Manner of Wearable Use: <i>Make knowledge visible</i></b>      |                       |                                                                                                                                   |             |                   |                             |                      |                        |                          |
|                                                                   | <b>Authors</b>        | <b>Paper Title</b>                                                                                                                | <b>Year</b> | <b>Paper Type</b> | <b>Wearable Types</b>       | <b>Subject Areas</b> | <b>Population Type</b> | <b>Settings</b>          |
| 73                                                                | Knight et al.         | Wearable technology: using Google Glass as a teaching tool                                                                        | 2015        | Study             | Smart glasses               | Medicine             | Teachers               | Surgical room            |
| 74                                                                | Kuhn et al.           | gPhysics- Using Smart Glasses for Head-Centered, Context-Aware Learning in Physics Experiments                                    | 2016        | Study             | Smart glasses               | Physics              | Students               | None                     |
| 75                                                                | Labus et al.          | Wearable Computing in EEducation                                                                                                  | 2015        | Design            | General                     | General              | Students               | None                     |
| 76                                                                | Lee et al.            | Appropriating Quantified Self Technologies to Support Elementary Statistical Teaching and Learning                                | 2016        | Study             | Smart wristband             | Statistics           | Students               | School                   |
| 77                                                                | Meyer et al.          | Investigating the effect of pretraining when learning through immersive virtual reality and video: A media and methods experiment | 2019        | Study             | Smart glasses               | Science              | Students               | School                   |
| 78                                                                | Norooz                | BodyVis: Body Learning Through Wearable Sensing and Visualization                                                                 | 2014        | Thesis            | Clothing                    | Anatomy              | Students               | Afterschool program      |
| 79                                                                | Norooz et al.         | BodyVis: A New Approach to Body Learning Through Wearable Sensing and Visualization                                               | 2015        | Study             | Clothing                    | Science              | Students + teachers    | Lab; Afterschool program |
| 80                                                                | Norooz et al.         | “That's Your Heart!”: Live Physiological Sensing and Visualization Tools for Life-Relevant and Collaborative STEM Learning        | 2016        | Study             | Clothing                    | Health               | Students               | Afterschool program      |
| 81                                                                | Pataranutaporn et al. | Wearable Wisdom: An Intelligent Audio-Based System for Mediating Wisdom and Advice                                                | 2020        | System            | Smart glasses               | General              | Students               | None                     |
| 82                                                                | Peppler and Glosson   | Learning About Circuitry with Etextiles in After-School Settings                                                                  | 2013        | Study             | Custom device               | Electronics          | Students               | None                     |
| 83                                                                | Pham and Hwang        | Card-based design combined with spaced repetition: A new interface for displaying learning elements and improving active recall   | 2016        | Study             | Smartwatch                  | Language             | Students               | None                     |
| 84                                                                | Ryokai et al.         | EnergyBugs: energy harvesting wearables for children                                                                              | 2014        | Study             | Custom device               | Energy               | Students               | Summer camp; School      |
| 85                                                                | Thees et al.          | Effects of augmented reality on learning and cognitive load in university physics laboratory courses                              | 2020        | Study             | Smart glasses               | Physics              | Students               | School                   |
| <b>Manner of Wearable Use: <i>As a platform to learn STEM</i></b> |                       |                                                                                                                                   |             |                   |                             |                      |                        |                          |
|                                                                   | <b>Authors</b>        | <b>Paper Title</b>                                                                                                                | <b>Year</b> | <b>Paper Type</b> | <b>Wearable Types</b>       | <b>Subject Areas</b> | <b>Population Type</b> | <b>Settings</b>          |
| 86                                                                | Brady et al.          | All Roads Lead to Computing: Making, Participatory Simulations, and Social Computing as Pathways to Computer Science              | 2017        | Study             | Custom device               | Programming          | Students               | School                   |

|     |                   |                                                                                                                                                 |      |        |               |                                  |          |                  |
|-----|-------------------|-------------------------------------------------------------------------------------------------------------------------------------------------|------|--------|---------------|----------------------------------|----------|------------------|
| 87  | Buechley et al.   | Towards a curriculum for electronic textiles in the high school classroom                                                                       | 2007 | Theory | Clothing      | Programming; Electronics         | Students | School; Workshop |
| 88  | Burg              | A STEM Incubator to Engage Students in Hands-on, Relevant Learning: A Report from the Field                                                     | 2016 | Study  | Custom device | Programming; Electronics         | Students | School           |
| 89  | Eisenberg et al.  | Invisibility Considered Harmful: Revisiting Traditional Principles of Ubiquitous Computing in the Context of Education                          | 2006 | Theory | Clothing      | Programming                      | Students | Lab              |
| 90  | Esakia et al.     | Augmenting Undergraduate Computer Science Education With Programmable Smartwatches                                                              | 2015 | Study  | Smartwatch    | Programming                      | Students | School           |
| 91  | Gregg et al.      | A Modern Wearable Devices Course for Computer Science Undergraduates                                                                            | 2017 | Theory | Custom device | Electronics                      | Students | School           |
| 92  | Jones et al.      | Wearable bits: Scaffolding creativity with a prototyping toolkit for wearable e-Textiles                                                        | 2020 | Design | Clothing      | Design                           | Students | Workshop         |
| 93  | Kuznetsov et al.  | Breaking boundaries: strategies for mentoring through textile and computing workshops                                                           | 2011 | Study  | Clothing      | Programming                      | Students | Workshop         |
| 94  | Lau et al.        | Learning programming through fashion and design: a pilot summer course in wearable computing for middle school students                         | 2009 | Study  | Clothing      | Programming                      | Students | Workshop         |
| 95  | Merkouris et al.  | Introducing Computer Programming to Children through Robotic and Wearable Devices                                                               | 2015 | Study  | Smartwatch    | Programming                      | Students | Lab              |
| 96  | Merkouris et al.  | Teaching Programming in Secondary Education Through Embodied Computing Platforms: Robotics and Wearables                                        | 2017 | Study  | Custom device | Programming                      | Students | School           |
| 97  | Ngai et al.       | An education-friendly construction platform for wearable computing                                                                              | 2009 | Design | Clothing      | Programming; Electronics         | Students | Summer camp      |
| 98  | Ngai et al.       | i*CATch: a scalable plug-n-play wearable computing framework for novices and children                                                           | 2010 | Design | Clothing      | Programming; Electronics         | Students | Workshop         |
| 99  | Ngai et al.       | Deploying a Wearable Computing Platform for Computing Education                                                                                 | 2009 | Study  | Clothing      | Programming; General engineering | Students | Summer camp      |
| 100 | Reichel et al.    | Smart Fashion and Learning about Digital Culture                                                                                                | 2006 | Study  | Clothing      | Programming                      | Students | None             |
| 101 | Reichel et al.    | Eduwear: Designing Smart Textiles for Playful Learning                                                                                          | 2008 | Design | Clothing      | Programming                      | Students | None             |
| 102 | Reimann           | Shaping Interactive Media with the Sewing Machine: Smart Textile as an Artistic Context to Engage Girls in Technology and Engineering Education | 2011 | Design | Gloves        | Programming                      | Students | None             |
| 103 | Reimann and Maday | Smart Textile objects and conductible ink as a context for arts based teaching and learning of computational thinking at primary school         | 2016 | System | Clothing      | Programming                      | Students | None             |
